# Supplementary material for: Plaque characteristics and biomarkers predicting regression and progression of carotid atherosclerosis
Source: PubMed Central journal article supplement — Cell Rep Med. 2022 Jul 19;3(7):100676. doi: 10.1016/j.xcrm.2022.100676 (PMC9381367; doi:10.1016/j.xcrm.2022.100676), 2022-07-19
Supplement: mmc1.pdf [file mmc1.pdf]

**Cell Reports Medicine, Volume 3**

**Supplemental information**

**Plaque characteristics and biomarkers  
predicting regression and progression  
of carotid atherosclerosis**

**Faisal Khan, Isabel Gonçalves, Angela C. Shore, Andrea Natali, Carlo Palombo, Helen M. Colhoun, Gerd Östling, Francesco Casanova, Cecilia Kennbäck, Kunihiro Aizawa, Margaretha Persson, Kim M. Gooding, David Strain, Helen Looker, Fiona Dove, Jill Belch, Silvia Pinnola, Elena Venturi, Michaela Kozakova, and Jan Nilsson**

**On-line supplemental data**

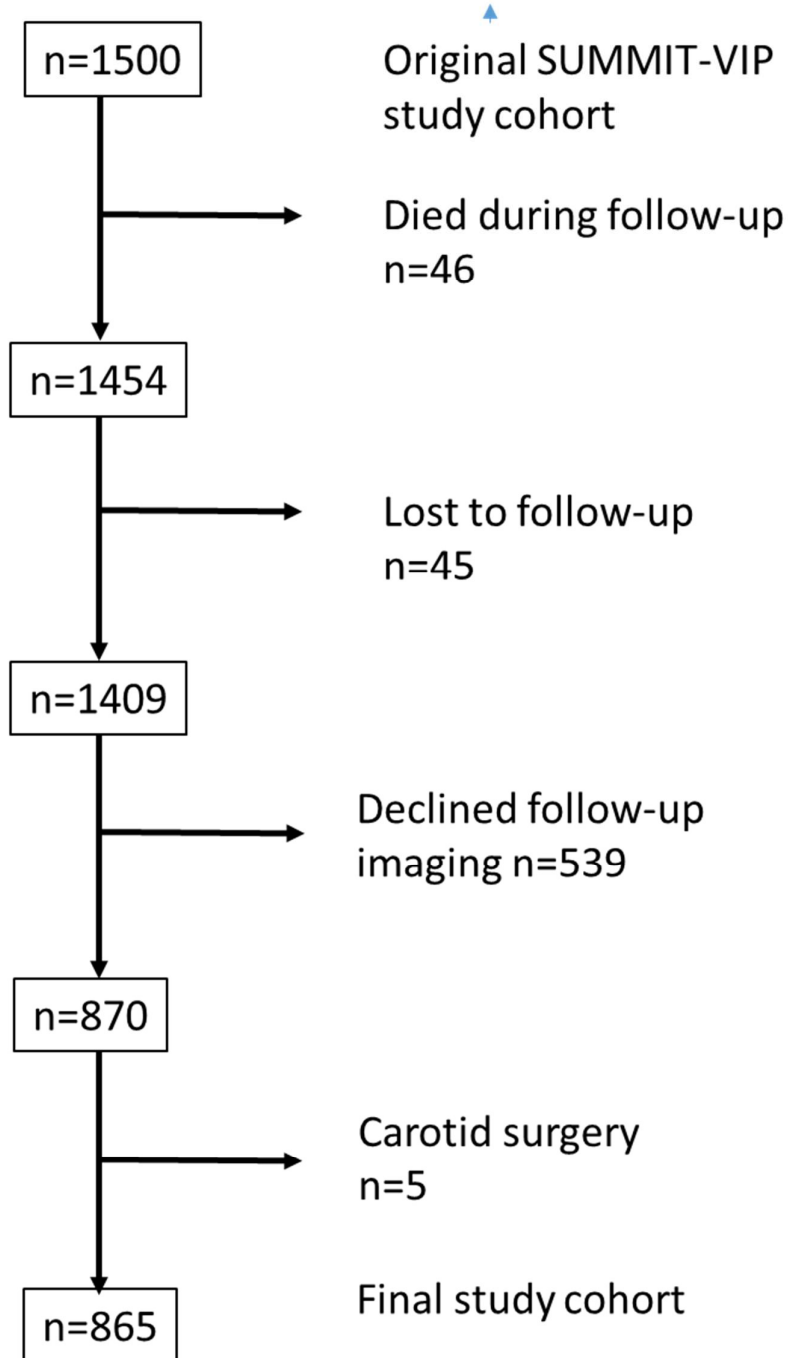

**Supplemental figure 1.** Consort flow diagram of study cohort. Related to table 1

**Supplemental table 1.** Baseline clinical characteristics of study subjects with and without T2D. Related to table 1.

|                                                     | <b>T2D<br/>(n=566)</b> | <b>Non-T2D<br/>(n=299)</b> | <b>P</b> |
|-----------------------------------------------------|------------------------|----------------------------|----------|
| Age (years)                                         | 68.5±8.0               | 67.4±9.1                   | 0.07     |
| Gender (% males)                                    | 70.0                   | 59.4                       | 0.09     |
| Current smokers (%)                                 | 8.7                    | 6.4                        | 0.30     |
| Prevalent CVD (%)                                   | 39.2                   | 41.3                       | 0.56     |
| Duration of T2D (years)                             | 10.7±7.8               | -                          |          |
| BMI (kg/m <sup>2</sup> )                            | 30.3±5.0               | 26.9±4.0                   | <0.001   |
| <b>Medications</b>                                  |                        |                            |          |
| Insulin (%)                                         | 25.4                   | 0                          |          |
| Statin (%)                                          | 74.3                   | 49.8                       | <0.001   |
| ACE inhibitors (%)                                  | 43.6                   | 24.7                       | <0.001   |
| Metformin (%)                                       | 70.0                   | 0                          |          |
| Betablockers (%)                                    | 34.5                   | 26.6                       | 0.02     |
| <b>Metabolic factors</b>                            |                        |                            |          |
| HbA1c (mmol/mmol)                                   | 57.1±13.2              | 38.9±3.9                   | <0.001   |
| LDL (mmol/L)                                        | 2.22±0.88              | 2.81±0.90                  | <0.001   |
| HDL (mmol/L)                                        | 1.28±0.39              | 1.52±0.42                  | <0.001   |
| Triglycerides (mmol/L)                              | 1.40 (1.00-2.09)       | 1.11 (0.83-1.54)           | <0.001   |
| <b>Blood pressure</b>                               |                        |                            |          |
| Systolic (mmHg)                                     | 136±18                 | 132±17                     | 0.006    |
| Diastolic (mmHg)                                    | 76±10                  | 76±9                       | 0.94     |
| <b>Renal function</b>                               |                        |                            |          |
| eGFR (mL/min <sup>-1</sup> per 1.73m <sup>2</sup> ) | 79.8±20.3              | 80.8±17.0                  | 0.47     |

Variables with normal distribution are shown as mean±standard deviation and skewed variables as median and interquartile range. eGFR; estimated glomerular filtration rate. Differences between means of normally distributed continuous variables were assessed with independent sample *t* tests and between skewed variables with the Mann-Whitney U-test.  $\chi^2$  test was used for categorical variables.

**Supplemental table 2.** Relationships between medications and change in carotid IMT. Related to table 2.

|                    | <b>Mean IMT</b> |           |             |             |
|--------------------|-----------------|-----------|-------------|-------------|
|                    | Regression      | No change | Progression | P for trend |
| <b>CCA</b>         | (n=181)         | (n=379)   | (n=299)     |             |
| Statin (%)         | 69.1            | 66.4      | 63.5        | ns          |
| ACE inhibitors (%) | 36.1            | 39.0      | 35.1        | ns          |
| Beta-blockers (%)  | 37.8            | 30.0      | 30.9        | ns          |
| Antiplatelet (%)   | 44.8            | 47.1      | 45.3        | ns          |
| <b>Bulb</b>        | (n=192)         | (n=206)   | (n=412)     |             |
| Statin (%)         | 67.4            | 60.3      | 65.0        | ns          |
| ACE inhibitors (%) | 34.2            | 33.3      | 38.1        | ns          |
| Beta-blockers (%)  | 29.6            | 26.1      | 33.2        | ns          |
| Antiplatelet (%)   | 45.5            | 39.2      | 43.3        | ns          |

P for trend was calculated by Chi-square linear-by-linear association.

**Supplemental table 3.** Relationships between baseline clinical characteristics with change in carotid IMT using  $\pm 0.1$  mm as cut-off for no change in IMT. Related to table 2.

|                          | <b>Mean bulb IMT</b> |                     |                      |
|--------------------------|----------------------|---------------------|----------------------|
|                          | Regression<br>n=137  | No change<br>n=367  | Progression<br>n=302 |
| Age (years)              | 68.2 $\pm$ 8.4       | 67.0 $\pm$ 8.6      | 69.5 $\pm$ 8.1***    |
| Male gender (%)          | 54.0                 | 61.9                | 69.9*                |
| Current smokers (%)      | 6.9                  | 7.4                 | 7.5                  |
| BMI (kg/m <sup>2</sup> ) | 29.1 $\pm$ 4.9*      | 28.1 $\pm$ 4.8      | 28.8 $\pm$ 4.5       |
| <b>Metabolic factors</b> |                      |                     |                      |
| HbA1c (mmol/mmol)        | 48.8 (40.8-60.0)     | 46.0 (40.0-57.0)    | 48.0 (39.0-59.0)     |
| LDL (mmol/L)             | 2.23 $\pm$ 0.94**    | 2.48 $\pm$ 0.92     | 2.53 $\pm$ 0.92      |
| HDL (mmol/L)             | 1.34 $\pm$ 0.40      | 1.40 $\pm$ 0.43     | 1.36 $\pm$ 0.42      |
| TG (mmol/L)              | 1.48<br>(1.04-2.04)  | 1.20<br>(0.90-1.67) | 1.30<br>(0.91-1.89)  |
| <b>Blood pressure</b>    |                      |                     |                      |
| Systolic (mmHg)          | 138 $\pm$ 17*        | 132 $\pm$ 17        | 137 $\pm$ 17**       |
| Diastolic (mmHg)         | 77 $\pm$ 9           | 76 $\pm$ 9          | 76 $\pm$ 10          |
| <b>Renal function</b>    |                      |                     |                      |
| eGFR                     | 78.5 $\pm$ 20.9      | 82.2 $\pm$ 17.5     | 79.0 $\pm$ 20.4      |
|                          | <b>Mean CCA IMT</b>  |                     |                      |
|                          | Regression<br>n=88   | No change<br>N=633  | Progression<br>n=142 |
| Age (years)              | 68.2 $\pm$ 8.4       | 68.1 $\pm$ 8.5      | 68.1 $\pm$ 8.2       |
| Male gender (%)          | 59.1                 | 63.8                | 63.4                 |
| Current smokers (%)      | 9.1                  | 7.8                 | 7.7                  |
| BMI (kg/m <sup>2</sup> ) | 29.9 $\pm$ 5.2       | 29.1 $\pm$ 5.7      | 28.7 $\pm$ 4.9       |
| <b>Metabolic factors</b> |                      |                     |                      |
| HbA1c (mmol/mmol)        | 49.9 (39.0-60.2)     | 48.0 (40.0-58.1)    | 47.0 (41.0-57.8)     |
| LDL (mmol/L)             | 2.28 $\pm$ 0.97      | 2.44 $\pm$ 0.94     | 2.45 $\pm$ 0.87      |
| HDL (mmol/L)             | 1.24 $\pm$ 0.44**    | 1.38 $\pm$ 0.42     | 1.28 $\pm$ 0.40      |
| TG (mmol/L)              | 1.50<br>(1.00-2.10)  | 1.30<br>(0.93-1.85) | 1.30<br>(0.90-1.86)  |
| <b>Blood pressure</b>    |                      |                     |                      |
| Systolic (mmHg)          | 137 $\pm$ 18         | 134 $\pm$ 17        | 137 $\pm$ 16         |
| Diastolic (mmHg)         | 77 $\pm$ 9*          | 75 $\pm$ 9          | 77 $\pm$ 10          |
| <b>Renal function</b>    |                      |                     |                      |
| eGFR                     | 77.9 $\pm$ 20.7      | 80.1 $\pm$ 19.0     | 82.2 $\pm$ 19.3      |

Variables with normal distribution are shown as mean $\pm$ standard deviation and skewed variables as median and interquartile range. eGFR (mL/min<sup>-1</sup> per 1.73m<sup>2</sup>). Differences between IMT change categories (regression and progression versus no change) were calculated with one-way ANOVA and significance of differences versus no change with Scheffé's post hoc test. Chi-square test was used to analyze difference between categorical variables. \*p<0.05, \*\*p<0.01 and \*\*\*p<0.001.

**Supplemental table 4.** Relationships between biomarkers and change in carotid bulb IMT using  $\pm 0.1$  mm as cut-off for no change in IMT. Related to table 3.

|                           | Regression<br>(n=137) | No change<br>(n=367) | Progression<br>(n=302) |
|---------------------------|-----------------------|----------------------|------------------------|
| <b>Inflammatory</b>       |                       |                      |                        |
| hsCRP (mg/L)              | 1.48 (0.69-3.15)      | 1.12 (0.60-2.32)     | 1.46 (0.75-2.90)       |
| IL-6                      | 42.5 (31.3-66.3)**    | 31.8 (22.2-48.2)     | 34.5 (23.7-56.2)       |
| MCP-1                     | 14.2 (10.9-18.0)***   | 11.4 (8.6-14.7)      | 11.5 (9.0-14.9)        |
| MIP-1 $\alpha$            | 5.13 (4.22-6.50)**    | 4.71 (3.97-5.39)     | 4.59 (3.86-5.66)       |
| <b>Matrix proteases</b>   |                       |                      |                        |
| MMP-3                     | 2.51 (1.91-3.40)      | 2.38 (1.90-2.97)     | 2.38 (1.91-3.03)       |
| MMP-7                     | 468 (282-676)         | 387 (283-559)        | 446 (311-690)*         |
| MMP-12                    | 154 (99-232)**        | 122 (91-169)         | 136 (98-199)*          |
| <b>Apoptosis</b>          |                       |                      |                        |
| TNFR-1                    | 6608 (5185-8192)*     | 6039 (5008-7473)     | 6295 (5185-7643)       |
| TRAILR-2                  | 3.68 (2.51-4.63)*     | 3.24 (2.35-4.21)     | 3.18 (2.31-4.33)       |
| Fas                       | 226 (177-280)*        | 197 (168-242)        | 198 (167-244)          |
| <b>SMC Growth factors</b> |                       |                      |                        |
| PDGF                      | 70.0 (29.2-166.8)***  | 132.5 (61.2-246.0)   | 174.8 (90.4-263.2)*    |
| EGF                       | 35.6 (11.0-73.5)***   | 51.1 (21.1-116.2)    | 67.6 (32.4-121.1)*     |
| HBEGF                     | 22.8 (18.9-29.0)**    | 25.9 (21.0-34.8)     | 26.7 (21.6-34.5)       |
| <b>EC growth factors</b>  |                       |                      |                        |
| HGF                       | 121 (93-150)**        | 101 (83-130)         | 103 (87-127)           |
| PIGF                      | 191 (144-246)**       | 163 (139-202)        | 168 (139-207)          |
| VEGF                      | 1510 (1193-1965)      | 1370 (1097-1783)     | 1370 (1097-1739)       |

All biomarkers except hsCRP are expressed as arbitrary units and values are shown as median and IQR. Differences between IMT change categories (regression and progression versus no change) were calculated with one-way ANOVA and Scheffe's post hoc test. \* $p < 0.05$ , \*\* $p < 0.01$  and \*\*\* $p < 0.001$ . If correcting for multiple comparisons in the present table, the threshold for significance is  $p < 0.004$ . SMC; smooth muscle cell, EC; endothelial cell.

**Supplemental table 5.** Relationships between biomarkers and change in common carotid IMT using  $\pm 0.1$  mm as cut-off for no change in IMT. Related to table 4.

|                           | Regression<br>(n=181) | No change<br>(n=379) | Progression<br>(n=299) |
|---------------------------|-----------------------|----------------------|------------------------|
| <b>Inflammatory</b>       |                       |                      |                        |
| hsCRP (mg/L)              | 1.12 (0.62-1.90)      | 1.33 (0.66-2.87)     | 1.20 (0.70-2.53)       |
| IL-6                      | 40.8 (24.1-61.0)      | 34.9 (23.2-53.1)     | 36.9 (25.4-61.0)       |
| MCP-1                     | 13.4 (10.5-16.1)      | 11.5 (8.8-15.5)      | 12.1 (9.7-15.6)        |
| MIP-1 $\alpha$            | 4.77 (3.79-6.00)      | 4.72 (3.95-5.74)     | 4.94 (4.00-5.99)       |
| <b>Matrix proteases</b>   |                       |                      |                        |
| MMP-3                     | 2.60 (1.95-3.13)      | 2.36 (1.89-3.07)     | 2.62 (1.92-3.34)       |
| MMP-7                     | 440 (220-709)         | 422 (296-633)        | 471 (335-704)          |
| MMP-12                    | 143 (107-205)         | 133 (97-201)         | 144 (100-207)          |
| <b>Apoptosis</b>          |                       |                      |                        |
| TNFR-1                    | 6427 (5293-8079)      | 6339 (5149-7804)     | 6295 (5104-7968)       |
| TRAILR-2                  | 3.89 (3.05-4.87)**    | 3.32 (2.37-4.32)     | 3.11 (2.42-4.19)       |
| Fas                       | 219 (173-267)         | 204 (169-247)        | 211 (170-272)          |
| <b>SMC Growth factors</b> |                       |                      |                        |
| PDGF                      | 84.4 (43.9-200.2)     | 144.0 (61.0-243.9)   | 133.9 (62.6-233.5)     |
| EGF                       | 41.1 (17.1-92.6)      | 53.8 (20.6-111.4)    | 51.2 (23.5-104.1)      |
| HBEGF                     | 24.1 (18.4-33.2)      | 25.3 (20.7-32.7)     | 26.4 (21.6-33.8)       |
| <b>EC growth factors</b>  |                       |                      |                        |
| HGF                       | 110 (88-133)          | 106 (87-133)         | 114 (87-137)           |
| PIGF                      | 183 (144-218)         | 171 (141-214)        | 173 (144-228)          |
| VEGF                      | 1443 (1193-1786)      | 1339 (1121-1795)     | 1448 (1105-1761)       |

All biomarkers except hsCRP are expressed as arbitrary units and values are shown as median and IQR. Differences between IMT change categories (regression and progression versus no change) were calculated with one-way ANOVA and Scheffe's post hoc test. \* $p < 0.05$ , \*\* $p < 0.01$  and \*\*\* $p < 0.001$ . If correcting for multiple comparisons in the present table, the threshold for significance is  $p < 0.004$ . SMC; smooth muscle cell, EC; endothelial cell.



**Supplemental table 6.** Relationships between baseline vascular measurements and change in carotid IMT using  $\pm 0.1$  mm as cut-off for no change in IMT. Related to table 5.

|                             | <b>Carotid bulb</b> |                  |                  |
|-----------------------------|---------------------|------------------|------------------|
|                             | Regression          | No change        | Progression      |
| <b>CCA</b>                  | n=191               | n=200            | n=412            |
| Mean IMT (mm)               | 0.88 (0.81-1.05)    | 0.86 (0.75-0.99) | 0.89 (0.78-1.03) |
| <b>Bulb</b>                 |                     |                  |                  |
| Mean IMT (mm)               | 1.31 (1.10-1.69)*** | 1.02 (0.87-1.19) | 1.10 (0.90-1.40) |
| GSM baseline                | 40 (28-63)***       | 66 (48-83)       | 69 (50-90)       |
| GSM follow-up               | 50 (35-70)***       | 67 (49-92)       | 73 (50-96)       |
| <b>Arterial stiffness</b>   |                     |                  |                  |
| PWV (m/s)                   | 10.9 (9.3-13.4)**   | 10.0 (8.6-11.9)  | 10.5 (8.9-12.5)  |
| <b>Endothelial function</b> |                     |                  |                  |
| RHI                         | 2.03 (1.75-2.47)*   | 2.19 (1.79-2.66) | 2.13 (1.79-2.62) |
|                             | <b>CCA</b>          |                  |                  |
| <b>CCA</b>                  | n=181               | n=379            | n=299            |
| Mean IMT (mm)               | 1.03 (0.88-1.24)*** | 0.87 (0.77-0.99) | 0.85 (0.74-0.99) |
| <b>Bulb</b>                 |                     |                  |                  |
| Mean IMT (mm)               | 1.10 (0.94-1.51)    | 1.06 (0.91-1.31) | 1.10 (0.93-1.39) |
| GSM baseline                | 58 (36-79)          | 64 (43-83)       | 67 (46-88)       |
| GSM follow-up               | 54 (43-71)          | 66 (46-87)       | 62 (47-87)       |
| <b>Arterial stiffness</b>   |                     |                  |                  |
| PWV (m/s)                   | 10.8 (9.6-13.6)     | 10.2 (8.7-12.4)  | 10.6 (9.0-12.6)  |
| <b>Endothelial function</b> |                     |                  |                  |
| RHI                         | 1.98 (1.74-2.39)    | 2.14 (1.76-2.64) | 2.16 (1.88-2.69) |

Grey scale median (GSM) value is the median of all grey levels of the pixels in the plaque. PWV; pulse wave velocity, RHI; reactive hyperemia index. Differences between IMT change categories (regression and progression versus no change) were calculated with one-way ANOVA and Scheffe's post hoc test. Values are shown as median and IQR. \* $p < 0.05$ , \*\* $p < 0.01$  and \*\*\* $p < 0.001$ .

**Supplemental table 7.** Relationships between biomarkers and change in carotid bulb IMT in subjects with T2D. Related to table 3.

|                           | Correlation | P       | Regression<br>(n=126) | No change<br>(n=125) | Progression<br>(n=269) |
|---------------------------|-------------|---------|-----------------------|----------------------|------------------------|
| <b>Inflammatory</b>       |             |         |                       |                      |                        |
| hsCRP (mg/L)              | 0.06        | ns      | 1.42 (0.66-3.30)      | 1.65 (0.65-2.96)     | 1.56 (0.73-3.00)       |
| IL-6                      | 0.01        | ns      | 41.4 (29.4-68.1)      | 33.4 (24.9-52.7)     | 36.3 (26.0-57.3)       |
| MCP-1                     | -0.05       | ns      | 13.7 (9.8-17.3)       | 11.4 (8.6-15.3)      | 12.0 (9.4-15.6)        |
| MIP-1 $\alpha$            | -0.07       | ns      | 4.89 (3.97-6.11)      | 4.68 (3.92-5.36)     | 4.66 (3.94-5.74)       |
| <b>Matrix proteases</b>   |             |         |                       |                      |                        |
| MMP-3                     | 0.00        | ns      | 2.51 (1.91-3.40)      | 2.38 (1.90-2.97)     | 2.38 (1.91-3.03)       |
| MMP-7                     | 0.12        | 0.005   | 452 (233-779)         | 405(304-564)         | 495 (341-719)*         |
| MMP-12                    | 0.05        | ns      | 154 (100-223)         | 128 (95-183)         | 151 (108-211)          |
| <b>Apoptosis</b>          |             |         |                       |                      |                        |
| TNFR-1                    | 0.04        | ns      | 6517 (5185-8422)      | 6320 (5113-7486)     | 6700 (5367-8192)       |
| TRAILR-2                  | -0.08       | ns      | 3.88 (2.59-5.07)      | 3.36 (2.57-4.32)     | 3.36 (2.48-4.53)       |
| Fas                       | -0.08       | ns      | 231 (176-286)         | 205 (168-247)        | 208 (175-251)          |
| <b>SMC Growth factors</b> |             |         |                       |                      |                        |
| PDGF                      | 0.28        | 8.8E-11 | 75.1 (33.3-164.3)**   | 137.7 (65.3-231.5)   | 177.3 (90.4-263.7)*    |
| EGF                       | 0.24        | 3.9E-8  | 33.8 (12.6-74.5)*     | 54.0 (25.1-106.0)    | 68.6 (32.4-123.6)      |
| HBEGF                     | 0.13        | 0.003   | 22.5 (18.5-29.2)      | 26.1 (20.7-33.6)     | 26.9 (21.6-34.3)       |
| <b>EC growth factors</b>  |             |         |                       |                      |                        |
| HGF                       | -0.04       | ns      | 123 (92-153)          | 104 (87-130)         | 110 (92-134)           |
| PIGF                      | -0.01       | ns      | 187 (143-246)         | 161 (142-198)        | 174 (146-217)          |
| VEGF                      | -0.03       | ns      | 1531 (1184-2091)      | 1389 (1142-1827)     | 1448 (1144-1808)       |

All biomarkers except hsCRP are expressed as arbitrary units and values are shown as median and IQR. Correlations are shown as Spearman rank correlation coefficients. Differences between IMT change categories (regression and progression versus no change) were calculated with one-way ANOVA and Scheffe's post hoc test. \*p<0.05, \*\*p<0.01 and \*\*\*p<0.001. If correcting for multiple comparisons in the present table, the threshold for significance is p<0.004. SMC; smooth muscle cell, EC; endothelial cell.

**Supplemental table 8.** Relationships between biomarkers and change in carotid bulb IMT in subjects without T2D. Related to table 3.

|                           | Correlation | P      | Regression<br>(n=65) | No change<br>(n=75) | Progression<br>(n=143) |
|---------------------------|-------------|--------|----------------------|---------------------|------------------------|
| <b>Inflammatory</b>       |             |        |                      |                     |                        |
| hsCRP (mg/L)              | -0.04       | ns     | 1.38 (0.70-2.55)     | 0.84 (0.60-2.06)    | 0.93 (0.60-2.01)       |
| IL-6                      | -0.10       | ns     | 35.3 (25.1-54.4)     | 26.7 (18.6-44.1)    | 25.5 (18.3-46.7)       |
| MCP-1                     | -0.19       | 0.002  | 13.0 (10.1-16.1)     | 11.7 (8.5-16.3)     | 10.5 (8.4-13.2)        |
| MIP-1 $\alpha$            | -0.22       | 3.4E-4 | 5.24 (4.32-6.64)*    | 4.77 (3.97-5.48)    | 4.42 (3.74-5.39)       |
| <b>Matrix proteases</b>   |             |        |                      |                     |                        |
| MMP-3                     | -0.13       | 0.03   | 2.69 (1.90-3.42)     | 2.41 (2.03-3.07)    | 2.23 (1.77-2.87)       |
| MMP-7                     | -0.08       | ns     | 503 (322-628)        | 353(272-530)        | 384 (293-547)          |
| MMP-12                    | -0.12       | 0.04   | 153 (96-238)**       | 116 (84-145)        | 117 (85-178)           |
| <b>Apoptosis</b>          |             |        |                      |                     |                        |
| TNFR-1                    | -0.15       | 0.01   | 6700 (5230-7954)*    | 5673 (4656-7145)    | 5576 (4713-6865)       |
| TRAILR-2                  | -0.17       | 0.004  | 3.52 (2.36-4.37)     | 2.87 (2.03-4.00)    | 2.76 (1.99-3.51)       |
| Fas                       | -0.22       | 2.6E-4 | 224 (181-271)        | 191 (166-241)       | 184 (159-222)          |
| <b>SMC Growth factors</b> |             |        |                      |                     |                        |
| PDGF                      | 0.27        | 6.0E-6 | 67.6 (26.9-177.3)**  | 124.5 (51.3-286.5)  | 168.3 (89.6-257.8)     |
| EGF                       | 0.25        | 2.5E-5 | 31.8 (7.09-72.8)**   | 46.9 (17.6-128.7)   | 65.1 (31.1-113.4)      |
| HBEGF                     | 0.15        | 0.01   | 24.0 (20.6-28.3)*    | 25.2 (21.5-39.9)    | 26.4 (22.0-35.2)       |
| <b>EC growth factors</b>  |             |        |                      |                     |                        |
| HGF                       | -0.23       | 1.3E-4 | 113 (93-138)*        | 97 (72-125)         | 92 (75-109)            |
| PIGF                      | -0.22       | 2.9E-4 | 192 (167-248)*       | 167 (135-231)       | 155 (134-187)          |
| VEGF                      | -0.16       | 0.007  | 1468 (1220-1898)     | 1342 (1029-1761)    | 1269 (1038-1593)       |

All biomarkers except hsCRP are expressed as arbitrary units and values are shown as median and IQR. Correlations are shown as Spearman rank correlation coefficients. Differences between IMT change categories (regression and progression versus no change) were calculated with one-way ANOVA and Scheffe's post hoc test. \*p<0.05, \*\*p<0.01 and \*\*\*p<0.001. If correcting for multiple comparisons in the present table, the threshold for significance is p<0.004. SMC; smooth muscle cell, EC; endothelial cell.

**Supplemental table 9.** Relationships between biomarkers and change in CCA IMT in subjects with T2D. Related to table 4.

|                          | Correlation | P       | Regression<br>(n=122) | No change<br>(n=256) | Progression<br>(n=186) |
|--------------------------|-------------|---------|-----------------------|----------------------|------------------------|
| <b>Inflammatory</b>      |             |         |                       |                      |                        |
| hsCRP (mg/L)             | 0.05        | ns      | 1.40 (0.69-3.60)      | 1.45 (0.66-3.10)     | 1.67 (0.86-3.00)       |
| IL-6                     | 0.01        | ns      | 41.3 (26.0-64.7)      | 36.8 (27.3-55.7)     | 38.6 (26.3-59.3)       |
| MCP-1                    | -0.08       | ns      | 13.4 (10.2-16.8)      | 11.5 (9.1-15.9)      | 12.2 (9.4-15.7)        |
| MIP-1 $\alpha$           | 0.01        | ns      | 4.86 (3.77-5.83)      | 4.72 (4.00-5.66)     | 4.72 (3.97-5.84)       |
| <b>Matrix proteases</b>  |             |         |                       |                      |                        |
| MMP-3                    | -0.04       | ns      | 2.68 (2.04-3.32)      | 2.31 (1.91-3.05)     | 2.51 (1.94-3.16)       |
| MMP-7                    | 0.12        | 0.004   | 399 (193-696)**       | 449 (308-686)        | 495 (347-718)          |
| MMP-12                   | 0.01        | ns      | 1347(101-209)         | 149 (105-207)        | 147 (103-215)          |
| <b>Apoptosis</b>         |             |         |                       |                      |                        |
| TNFR-1                   | -0.06       | ns      | 6608 (5557-8452)      | 6700 (5176-8135)     | 6562 (5221-8023)       |
| TRAILR-2                 | -0.18       | <0.0001 | 4.04 (3.11-5.06)**    | 3.43 (2.46-4.53)     | 3.27 (2.48-4.35)       |
| Fas                      | -0.02       | ns      | 215 (175-267)         | 208 (175-244)        | 212 (171-266)          |
| <b>Growth factors</b>    |             |         |                       |                      |                        |
| PDGF                     | 0.09        | 0.037   | 88.0 (41.1-215.3)*    | 144.0 (67.2-247.7)   | 153.3 (72.0-245.6)     |
| EGF                      | 0.02        | ns      | 42.5 (16.7-111.3)     | 55.3 (24.4-111.4)    | 58.1 (21.5-108.8)      |
| HBEGF                    | 0.06        | ns      | 24.1 (18.5-33.4)      | 25.3 (20.5-32.7)     | 26.2 (20.7-33.6)       |
| <b>EC growth factors</b> |             |         |                       |                      |                        |
| HGF                      | -0.04       | ns      | 117 (93-143)          | 111 (92-136)         | 111 (91-141)           |
| PIGF                     | -0.01       | ns      | 184 (145-243)         | 171 (144-212)        | 167 (144-221)          |
| VEGF                     | -0.03       | ns      | 1520 (1209-1868)      | 1489 (1168-1898)     | 1389 (1128-1758)       |

All biomarkers except hsCRP are expressed as arbitrary units and values are shown as median and IQR. Correlations are shown as Spearman rank correlation coefficients. Differences between IMT change categories (regression and progression versus no change) were calculated with one-way ANOVA and Scheffe's post hoc test. \*p<0.05, \*\*p<0.01 and \*\*\*p<0.001. If correcting for multiple comparisons in the present table, the threshold for significance is p<0.004. SMC; smooth muscle cell, EC; endothelial cell.

**Supplemental table 10.** Relationships between biomarkers and change in CCA IMT in subjects without T2D. Related to table 4.

|                          | Correlation | P    | Regression (n=59)  | No change (n=122)  | Progression (n=113) |
|--------------------------|-------------|------|--------------------|--------------------|---------------------|
| <b>Inflammatory</b>      |             |      |                    |                    |                     |
| hsCRP (mg/L)             | -0.04       | ns   | 0.96 (0.63-1.69)   | 0.98 (0.60-2.20)   | 0.95 (0.60-2.12)    |
| IL-6                     | -0.04       | ns   | 35.3 (21.6-50.6)   | 29.2 (18.3-46.4)   | 31.3 (20.0-47.8)    |
| MCP-1                    | 0.02        | ns   | 11.8 (8.9-14.8)    | 11.2 (8.5-14.3)    | 11.6 (8.7-14.8)     |
| MIP-1 $\alpha$           | -0.01       | ns   | 4.79 (3.93-5.80)   | 4.77 (4.02-6.02)   | 4.69 (3.92-5.82)    |
| <b>Matrix proteases</b>  |             |      |                    |                    |                     |
| MMP-3                    | 0.06        | ns   | 2.35 (1.93-2.99)   | 2.40 (1.79-3.04)   | 2.34 (1.90-3.35)    |
| MMP-7                    | -0.12       | 0.05 | 501 (301-664)      | 392 (292-614)      | 383 (276-541)       |
| MMP-12                   | -0.04       | ns   | 1347(101-209)      | 149 (105-207)      | 147 (103-215)       |
| <b>Apoptosis</b>         |             |      |                    |                    |                     |
| TNFR-1                   | -0.06       | ns   | 6383 (4873-7697)   | 5894 (4999-7345)   | 5873 (4837-7082)    |
| TRAILR-2                 | -0.07       | ns   | 3.48 (2.41-4.18)   | 2.85 (1.97-3.86)   | 2.85 (2.32-3.72)    |
| Fas                      | -0.02       | ns   | 202 (159-236)      | 195 (162-238)      | 194 (164-239)       |
| <b>Growth factors</b>    |             |      |                    |                    |                     |
| PDGF                     | 0.05        | ns   | 122.8 (43.0-200.9) | 145.0 (58.3-254.2) | 115.4 (57.3-240.5)  |
| EGF                      | -0.03       | ns   | 50.2 (16.6-108.8)  | 44.9 (20.6-115.2)  | 47.5 (18.9-94.4)    |
| HBEGF                    | 0.01        | ns   | 25.6 (21.5-33.4)   | 25.6 (21.4-32.8)   | 24.9 (21.9-34.5)    |
| <b>EC growth factors</b> |             |      |                    |                    |                     |
| HGF                      | -0.01       | ns   | 101 (82-123)       | 96 (78-122)        | 96 (78-123)         |
| PIGF                     | -0.04       | ns   | 177 (146-226)      | 174 (140-208)      | 170 (134-218)       |
| VEGF                     | 0.01        | ns   | 1389 (1105-1652)   | 1342 (1044-1675)   | 1389 (1053-1687)    |

All biomarkers except hsCRP are expressed as arbitrary units and values are shown as median and IQR. Correlations are shown as Spearman rank correlation coefficients. Differences between IMT change categories (regression and progression versus no change) were calculated with one-way ANOVA and Scheffe's post hoc test. \*p<0.05, \*\*p<0.01 and \*\*\*p<0.001. If correcting for multiple comparisons in the present table, the threshold for significance is p<0.004. SMC; smooth muscle cell, EC; endothelial cell.

**Supplemental table 11.** Relationships between baseline vascular measurements and change in carotid bulb IMT. Related to table 5.

|                             | <b>T2D</b>     |        |                     |                   |                  |
|-----------------------------|----------------|--------|---------------------|-------------------|------------------|
|                             | Correlation    | P      | Regression          | No change         | Progression      |
| <b>CCA</b>                  |                |        | n=126               | n=125             | n=269            |
| Mean IMT (mm)               | 0.03           | ns     | 0.89 (0.80-1.02)    | 0.88 (0.77-0.98)  | 0.86 (0.74-0.99) |
| <b>Bulb</b>                 |                |        |                     |                   |                  |
| Mean IMT (mm)               | 0.02           | ns     | 1.23 (1.01-1.63)*** | 1.06 (0.89-1.23)  | 1.11 (0.94-1.37) |
| GSM baseline                | 0.16           | 0.001  | 43 (31-69)***       | 65 (49-84)        | 67 (46-85)       |
| GSM follow-up               | 0.23           | 6.9E-5 | 51 (35-68)**        | 67 (49-91)        | 60 (46-83)       |
| <b>Arterial stiffness</b>   |                |        |                     |                   |                  |
| PWV (m/s)                   | 0.12           | ns     | 11.2 (9.3-13.3)     | 10.2 (8.9-12.3)   | 10.7 (9.2-12.6)  |
| <b>Endothelial function</b> |                |        |                     |                   |                  |
| RHI                         | 0.00           | ns     | 1.97 (1.68-2.45)    | 2.11 (1.66-2.58)  | 2.04 (1.65-2.57) |
|                             | <b>Non-T2D</b> |        |                     |                   |                  |
| <b>CCA</b>                  |                |        | n=65                | n=75              | n=143            |
| Mean IMT (mm)               | 0.00           | ns     | 0.86 (0.80-1.02)    | 0.83 (0.74-0.984) | 0.87 (0.75-0.98) |
| <b>Bulb</b>                 |                |        |                     |                   |                  |
| Mean IMT (mm)               | -0.16          | 0.01   | 1.21 (1.01-1.49)*** | 0.99 (0.87-1.16)  | 1.01 (0.87-1.26) |
| GSM baseline                | 0.25           | 1.9E-4 | 45 (31-78)**        | 68 (49-94)        | 69 (56-87)       |
| GSM follow-up               | 0.23           | 0.007  | 59 (43-75)          | 70 (55-87)        | 72 (50-108)      |
| <b>Arterial stiffness</b>   |                |        |                     |                   |                  |
| PWV (m/s)                   | -0.07          | ns     | 10.2 (9.2-12.6)**   | 9.0 (7.9-10.4)    | 9.7 (8.3-11.4)   |
| <b>Endothelial function</b> |                |        |                     |                   |                  |
| RHI                         | -0.03          | ns     | 2.31 (1.91-2.83)    | 2.36 (2.04-2.71)  | 2.38 (1.90-2.75) |

Grey scale median (GSM) value is the median of all grey levels of the pixels in the plaque. PWV; pulse wave velocity, RHI; reactive hyperemia index. Correlations are shown as Spearman rank correlation coefficients. Differences between IMT change categories (regression and progression versus no change) were calculated with one-way ANOVA and Scheffe's post hoc test. Values are shown as median and IQR. \*p<0.05, \*\*p<0.01 and \*\*\*p<0.001.

**Supplemental table 12.** Relationships between baseline vascular measurements and change in CCA IMT. Related to table 5.

|                             | <b>T2D</b>     |        |                       |                      |                        |
|-----------------------------|----------------|--------|-----------------------|----------------------|------------------------|
|                             | Correlation    | P      | Regression<br>(n=122) | No change<br>(n=256) | Progression<br>(n=186) |
| <b>CCA</b>                  |                |        |                       |                      |                        |
| Mean IMT (mm)               | -0.23          | 4.2E-8 | 0.98 (0.86-1.15)***   | 0.88 (0.77-0.99)     | 0.86 (0.74-1.00)       |
| <b>Bulb</b>                 |                |        |                       |                      |                        |
| Mean IMT (mm)               | -0.02          | ns     | 1.13 (0.94-1.45)      | 1.06 (0.93-1.34)     | 1.11 (0.94-1.37)       |
| GSM baseline                | 0.13           | 0.007  | 51 (37-79)            | 62 (44-84)           | 67 (46-85)             |
| GSM follow-up               | 0.12           | 0.034  | 53 (42-73)            | 68 (43-91)           | 60 (46-83)             |
| <b>Arterial stiffness</b>   |                |        |                       |                      |                        |
| PWV (m/s)                   | -0.09          | ns     | 11.6 (9.9-13.7)       | 10.5 (8.9-13.1)      | 10.7 (9.2-12.6)        |
| <b>Endothelial function</b> |                |        |                       |                      |                        |
| RHI                         | 0.05           | ns     | 1.97 (1.70-2.43)      | 2.03 (1.67-2.49)     | 2.06 (1.75-2.47)       |
|                             | <b>Non-T2D</b> |        |                       |                      |                        |
|                             |                |        | Regression<br>(n=126) | No change<br>(n=125) | Progression<br>(n=269) |
| <b>CCA</b>                  |                |        |                       |                      |                        |
| Mean IMT (mm)               | -0.24          | 3.1E-5 | 0.94 (0.83-1.12)***   | 0.85 (0.75-0.98)     | 0.83 (0.73-0.92)       |
| <b>Bulb</b>                 |                |        |                       |                      |                        |
| Mean IMT (mm)               | 0.03           | ns     | 1.05 (0.90-1.35)      | 1.03 (0.88-1.29)     | 1.06 (0.87-1.30)       |
| GSM baseline                | -0.03          | 0.001  | 63 (37-78)            | 70 (46-8)            | 60 (40-82)             |
| GSM follow-up               | 0.03           | 6.9E-5 | 62 (48-75)            | 70 (48-92)           | 64 (49-86)             |
| <b>Arterial stiffness</b>   |                |        |                       |                      |                        |
| PWV (m/s)                   | -0.12          | 0.04   | 10.2 (9.2-11.5)       | 9.5 (8.3-11.6)       | 9.5 (8.2-11.0)         |
| <b>Endothelial function</b> |                |        |                       |                      |                        |
| RHI                         | 0.00           | ns     | 2.26 (1.83-2.74)      | 2.44 (1.99-2.80)     | 2.35 (1.99-2.74)       |

Grey scale median (GSM) value is the median of all grey levels of the pixels in the plaque. PWV; pulse wave velocity, RHI; reactive hyperemia index. Correlations are shown as Spearman rank correlation coefficients. Differences between IMT change categories (regression and progression versus no change) were calculated with one-way ANOVA and Scheffe's post hoc test. Values are shown as median and IQR. \*p<0.05, \*\*p<0.01 and \*\*\*p<0.001.

**Supplemental table 13.** Biomarkers in T2D subjects without and with insulin treatment. Related to table 3.

|                           | No insulin<br>(n=419) | Insulin<br>(n=143) | P     |
|---------------------------|-----------------------|--------------------|-------|
| <b>Inflammatory</b>       |                       |                    |       |
| hsCRP (mg/L)              | 1.43 (0.67-2.94)      | 1.80 (0.84-3.51)   | 0.04  |
| IL-6                      | 36.6 (25.4-56.2)      | 41.6 (31.8-64.9)   | 0.007 |
| MCP-1                     | 11.9 (9.2-15.9)       | 12.6 (10.0-16.3)   | ns    |
| MIP-1 $\alpha$            | 4.68 (3.95-5.67)      | 4.92 (4.00-5.90)   | ns    |
| <b>Matrix proteases</b>   |                       |                    |       |
| MMP-3                     | 2.45 (1.97-3.05)      | 2.27 (1.87-3.27)   | ns    |
| MMP-7                     | 428 (290-665)         | 532(356-733)       | 0.001 |
| MMP-12                    | 140 (101-205)         | 170 (115-232)      | 0.003 |
| <b>Apoptosis</b>          |                       |                    |       |
| TNFR-1                    | 6427 (5221-7968)      | 7231 (5595-8964)   | 0.001 |
| TRAILR-2                  | 3.40 (2.52-4.53)      | 3.76 (2.71-5.31)   | 0.02  |
| Fas                       | 211 (175-256)         | 208 (168-263)      | ns    |
| <b>SMC Growth factors</b> |                       |                    |       |
| PDGF                      | 137.2 (57.3-242.2)    | 160.9 (71.0-240.5) | ns    |
| EGF                       | 51.1 (19.8-104.0)     | 61.0 (29.4-124.5)  | 0.045 |
| HBEGF                     | 25.5 (19.8-33.1)      | 25.3 (20.0-32.7)   | ns    |
| <b>EC growth factors</b>  |                       |                    |       |
| HGF                       | 110 (92-137)          | 120 (83-144)       | ns    |
| PIGF                      | 171 (143-214)         | 177 (146-228)      | ns    |
| VEGF                      | 1428 (1160-1833)      | 1563 (1209-1859)   | ns    |

All biomarkers except hsCRP are expressed as arbitrary units and values are shown as median and IQR. Comparisons between the groups were done using the Mann-Whitney U test. If correcting for multiple comparisons in the present table, the threshold for significance is  $p < 0.004$ . SMC; smooth muscle cell, EC; endothelial cell.



**Supplemental table 14.** Vascular measurements in T2D subjects without and with insulin treatment. Related to table 5.

|                           | No insulin<br>(n=419) | Insulin<br>(n=143) | P      |
|---------------------------|-----------------------|--------------------|--------|
| Bulb baseline IMT (mm)    | 1.06 (0.93-1.31)      | 1.22 (1.00-1.56)   | <0.001 |
| CCA baseline IMT (mm)     | 0.89 (0.77-1.03)      | 0.90 (0.81-1.03)   | ns     |
| Progression bulb IMT (mm) | 0.06 (-0.03-0.17)     | 0.06 (-0.11-0.20)  | ns     |
| Progression CCA IMT (mm)  | 0.02 (-0.04-0.08)     | 0.00 (-0.05-0.06)  | (0.05) |
| GSM baseline              | 64 (44-89)            | 59 (39-79)         | ns     |
| GSM follow-up             | 61 (44-84)            | 62 (43-85)         | ns     |
| PWV (m/s)                 | 10.5 (8.9-12.8)       | 12.0 (9.9-14.0)    | <0.001 |
| RHI                       | 2.05 (1.73-2.51)      | 1.97 (1.65-2.35)   | ns     |

Grey scale median (GSM) value is the median of all grey levels of the pixels in the plaque. PWV; pulse wave velocity, RHI; reactive hyperemia index. Comparisons between the groups were done using the Mann-Whitney U test.
